# Supplementary material for: A High Protein Diet Is More Effective in Improving Insulin Resistance and Glycemic Variability Compared to a Mediterranean Diet—A Cross-Over Controlled Inpatient Dietary Study
Source: MDPI journal article supplement (doi:10.3390/nu13124380), 2021-12-07
Supplement: s1 [file s1]

Table S1. Details on food provided with the two diets.

| Meal            | HP diet                                                                                                                                                                                                                                                                                                  | M diet                                                                                                                                                                                                                                                             |
|-----------------|----------------------------------------------------------------------------------------------------------------------------------------------------------------------------------------------------------------------------------------------------------------------------------------------------------|--------------------------------------------------------------------------------------------------------------------------------------------------------------------------------------------------------------------------------------------------------------------|
| Breakfast       | Milk or yogurt<br>with white bread or rusks                                                                                                                                                                                                                                                              | Milk or yogurt<br>with wholemeal bread or wholemeal<br>rusks                                                                                                                                                                                                       |
| Lunch/Dinner    | First course: pasta or white rice<br>with simple seasoning (vegetables<br>or tomato sauce) and Parmesan<br>cheese;<br>Second course*: white meat, fish,<br>eggs, legumes or cheese and<br>seasonal vegetables with olive oil<br>and wholemeal bread;<br>Fruit flavoured low-fat yogurt or<br>fresh fruit | First course: wholemeal pasta with<br>simple seasoning (vegetables or<br>tomato sauce);<br>Second course †: white meat,<br>bluefish, eggs, legumes or goat<br>cheese and seasonal vegetables with<br>extra virgin olive oil and wholemeal<br>bread;<br>Fresh fruit |
| Afternoon snack | -                                                                                                                                                                                                                                                                                                        | Walnuts                                                                                                                                                                                                                                                            |

\* Second course protein source: in HP diet was: 4/14 meals with white meat, 4/14 with fish, 2/14 with eggs, 2/14 with legumes and 2/14 with cheese. † Second course protein source in M diet was: 3/13 meals with white meat, 3/14 with bluefish, 4/14 with legumes, and 2/14 with goat cheese and 2/14 with eggs.

**Table S2. Difference between the two diets in glycemic exposure, control and variability.**

| Glucose outcome                                           | N  | Diet | Unadjusted mean<br>(95% CI) | Unadjusted difference<br>HP vs M diet<br>(95% CI) | Adjusted difference<br>HP vs M diet<br>(95% CI) | P      |
|-----------------------------------------------------------|----|------|-----------------------------|---------------------------------------------------|-------------------------------------------------|--------|
| Glucose exposure                                          |    |      |                             |                                                   |                                                 |        |
| Mean daily glucose concentration (mg/dl)                  | 16 | HP   | 93.15<br>(84.01, 102.28)    | -0.29<br>(-4.82, 4.25)                            | 0.006<br>(-5.07, 5.08)                          | 0.998  |
|                                                           |    | M    | 93.43<br>(86.71, 100.15)    |                                                   |                                                 |        |
| Glucose variability                                       |    |      |                             |                                                   |                                                 |        |
| Standard Deviation of daily glucose concentration (mg/dl) | 16 | HP   | 14.80<br>(13.19, 16.42)     | -2.17<br>(-4.02, -0.33)                           | -3.13<br>(-4.60, -1.67)                         | 0.0004 |
|                                                           |    | M    | 16.97<br>(14.70, 19.25)     |                                                   |                                                 |        |
| Mean Amplitude of Glucose Excursion                       | 16 | HP   | 29.58<br>(26.26, 32.90)     | -2.87<br>(-7.49, 1.75)                            | -5.10<br>(-9.01, -1.18)                         | 0.014  |
|                                                           |    | M    | 32.45<br>(28.20, 36.70)     |                                                   |                                                 |        |
| Mean Of Daily Differences                                 | 16 | HP   | 10.67<br>(9.29, 12.06)      | -0.64<br>(-2.38, 1.11)                            | -1.50<br>(-2.95, -0.048)                        | 0.044  |
|                                                           |    | M    | 11.31<br>(10.13, 12.49)     |                                                   |                                                 |        |
| Glucose ranges                                            |    |      |                             |                                                   |                                                 |        |

|                                                                              |    |    |                         |                         |                        |        |
|------------------------------------------------------------------------------|----|----|-------------------------|-------------------------|------------------------|--------|
| <b>Proportion of time spent with glucose level in range 70–180 mg/dl (%)</b> | 16 | HP | 86.91<br>(75.13, 98.69) | -2.02<br>(-10.17, 6.13) | -0.77<br>(-9.72, 8.18) | 0.8568 |
|                                                                              |    | M  | 88.93<br>(81.23, 96.63) |                         |                        |        |

|                                                                     |    |    |                        |                        |                       |       |
|---------------------------------------------------------------------|----|----|------------------------|------------------------|-----------------------|-------|
| <b>Proportion of time spent with glucose level &lt;70 mg/dl (%)</b> | 16 | HP | 13.63<br>(1.46, 25.80) | 1.72<br>(-6.57, 10.01) | 0.63<br>(-8.53, 9.79) | 0.885 |
|                                                                     |    | M  | 11.91<br>(3.82, 20.01) |                        |                       |       |

|                                                                      |    |    |                      |                        |                        |       |
|----------------------------------------------------------------------|----|----|----------------------|------------------------|------------------------|-------|
| <b>Proportion of time spent with glucose level &gt;180 mg/dl (%)</b> | 16 | HP | 0.23<br>(0.06, 0.40) | -0.08<br>(-0.35, 0.19) | -0.17<br>(-0.44, 0.11) | 0.223 |
|                                                                      |    | M  | 0.31<br>(0.08, 0.54) |                        |                        |       |

---

Adjusted estimates with their 95% CI were calculated by a mixed effect regression model. Fixed terms were treatment (HP over M), sequence, period (P1 over P2). HP: high protein diet; M: Mediterranean diet; (N=16).
